# Supplementary material for: Free-standing polydopamine films generated in the presence of different metallic ions: the comparison of reaction process and film properties
Source: Royal Society of Chemistry journal article supplement (doi:10.1039/c8ra02930j), 2018-01-01
Supplement: c8ra02930j1.pdf [file c8ra02930j1.pdf]

## Supplementary Information

# **Free-standing polydopamine films generated in the presence of different metallic ions: the comparison of reaction process and film properties**

Xuwen Han, Feng Tang and Zhaoxia Jin\*

Department of Chemistry, Renmin University of China

Beijing, 100872

Peoples Republic of China

## Contents

|                                                                                                                              |    |
|------------------------------------------------------------------------------------------------------------------------------|----|
| 1. Figures .....                                                                                                             | 3  |
| Figure S1. UV-vis spectra of oxidative polymerization of dopamine.....                                                       | 3  |
| Figure S2. UV-vis spectra of oxidative polymerization of dopamine in the existence<br>of Co <sup>2+</sup> metal<br>ions..... | 4  |
| Figure S3. SEM images of Mg-PDA film formation at 60°C for 2 days.....                                                       | 4  |
| Figure S4. AFM images of PDA films for 150 minutes reaction<br>.....                                                         | 5  |
| Figure S5. SEM images of PDA films for 20 days reaction.....                                                                 | 5  |
| Figure S6. The high-resolution XPS spectra of the C 1s for PDA films.....                                                    | 6  |
| Figure S7. The high-resolution XPS spectra of the N 1s for PDA<br>films.....                                                 | 8  |
| Figure S8. The high-resolution XPS spectra of the O 1s for PDA<br>films.....                                                 | 10 |
| Figure S9. Raman spectra of the lower surface of PDA<br>films.....                                                           | 11 |
| Figure S10. DLS of PDA nanoparticles for 1 h reaction.....                                                                   | 12 |
| 2. Tables .....                                                                                                              | 3  |
| Table S1. The purity and the contents of main impurity in used four salts.....                                               | 3  |
| Table S2. The contents of metallic ions in polydopamine films and nanoparticles<br>obtained by ICP-OES.....                  | 3  |
| Table S3. The detailed component in C 1s of polydopamine films and nanoparticles<br>generated in different conditions.....   | 7  |
| Table S4. The detailed component in N 1s of polydopamine films and nanoparticles<br>generated in different conditions.....   | 9  |
| Table S5. The detailed component in O 1s of polydopamine films and nanoparticles<br>generated in different conditions.....   | 11 |



Table S1. The purity and the contents of main impurity in four salts used.

| Composition at. ( $\geq\%$ )              |       | Impurities ( $\leq\%$ ) |       |        |
|-------------------------------------------|-------|-------------------------|-------|--------|
|                                           |       | Mg                      | Ca    | Fe     |
| NaCl (AR)                                 | 99.5  | 0.002                   | 0.005 | 0.0002 |
| MgCl <sub>2</sub> •6H <sub>2</sub> O (AR) | 98.0  | ~                       | 0.05  | 0.0005 |
| CaCl <sub>2</sub> (AR)                    | 96.0  | 0.3                     | ~     | 0.001  |
| CoCl <sub>2</sub> •6H <sub>2</sub> O (CP) | 99.99 | ~                       | ~     | ~      |

Table S2. The contents of different metallic elements (at.%) in polydopamine films and nanoparticles obtained through ICP-OES.

| Molar percentage | Na in Na-PDA | Mg in Mg-PDA | Ca in Ca-PDA | Co in Co-PDA |
|------------------|--------------|--------------|--------------|--------------|
| film             | 7.35%        | 1.31%        | 2.56%        | 0.20%        |
| nanoparticles    | 8.59%        | 1.06%        | 2.22%        | 0.16%        |

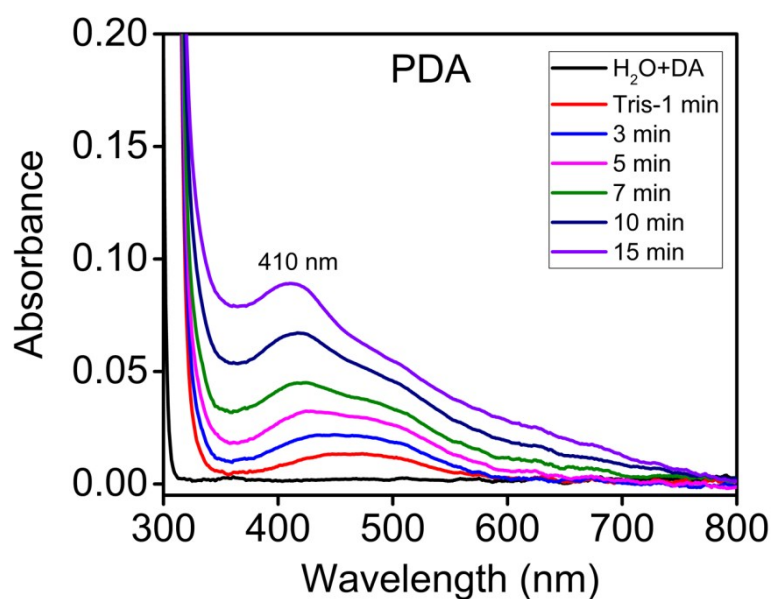

Figure S1. UV-vis spectra of oxidative polymerization of dopamine (10 mM) in the addition of Tris buffer (10 mM, pH = 8.8).

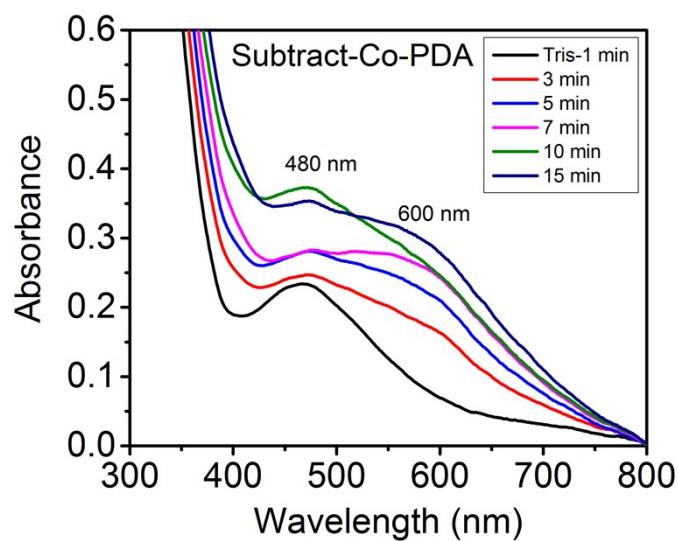

Figure S2. UV-vis spectra of oxidative polymerization of dopamine (10 mM) in the presence of  $\text{Co}^{2+}$  (100 mM) in which the absorption spectrum of  $\text{Co}^{2+}$  was subtracted.

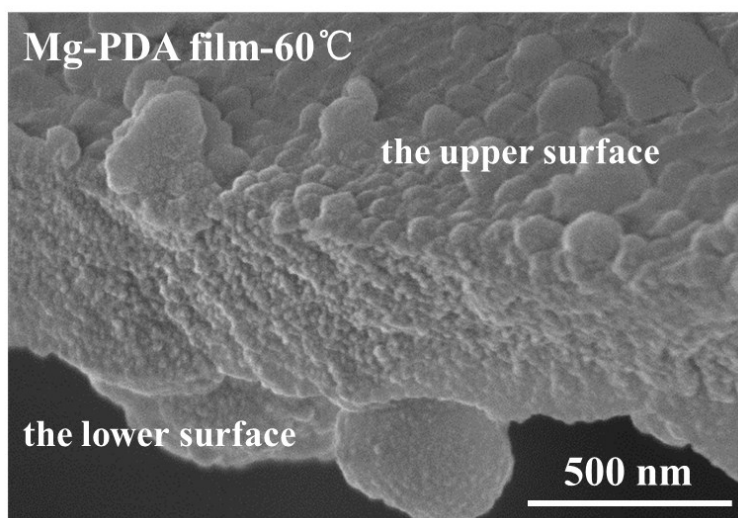

Figure S3. SEM images of rugged Mg-PDA film formation at 60 °C for 2 days. The concentration of dopamine was 10 mM, while the concentration for  $\text{Mg}^{2+}$  metal ions was 100 mM.

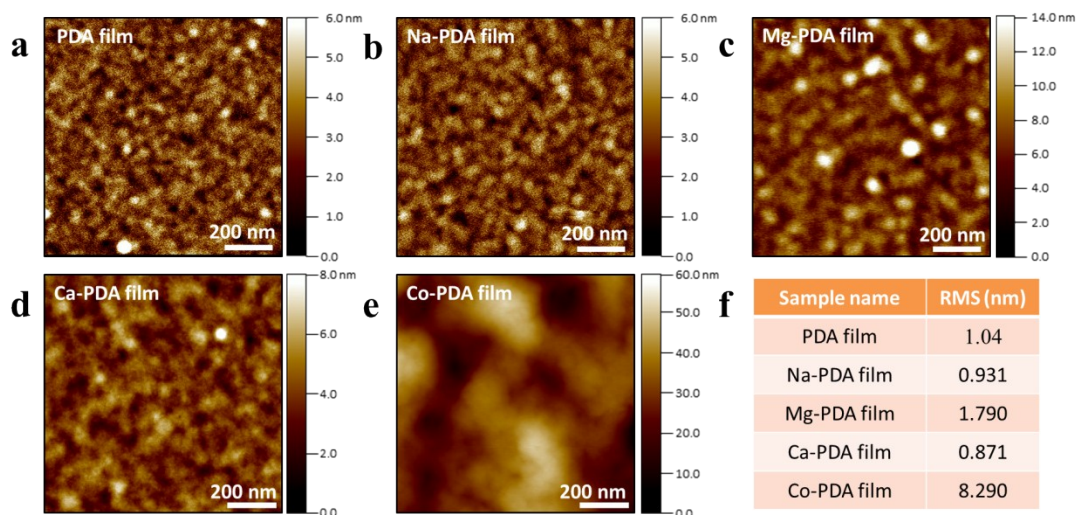

Figure S4. AFM images of PDA films generated in different conditions after reaction of 150 minutes. (a) Without salt. (b) With NaCl (100 mM). (c) With MgCl<sub>2</sub> (100 mM). (d) With CaCl<sub>2</sub> (100 mM). (e) With CoCl<sub>2</sub> (100 mM). (f) Root mean roughness (RMS) of these PDA films.

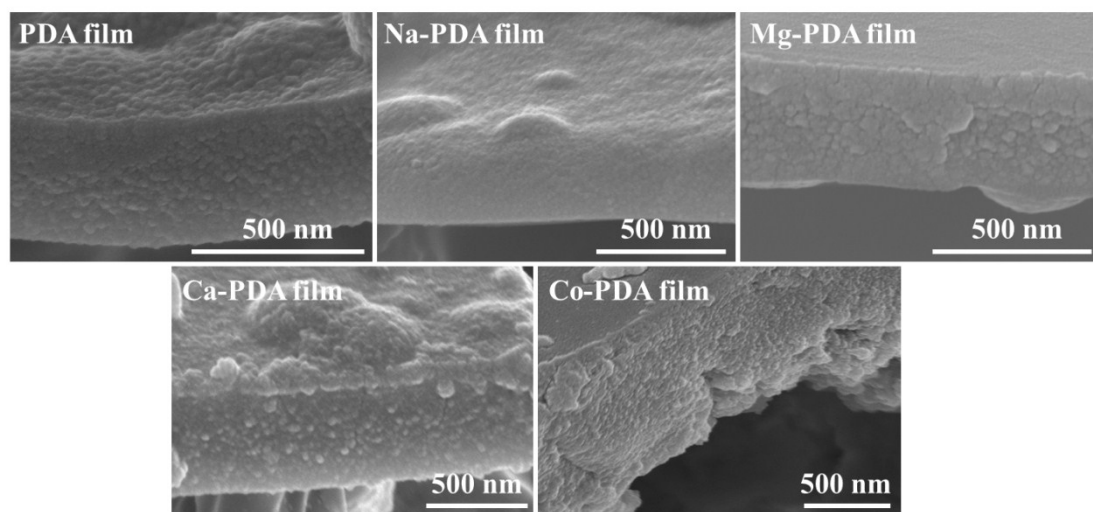

Figure S5. SEM images of PDA films generated in different conditions after reaction of 20 days, cross-section of films shown their thickness.

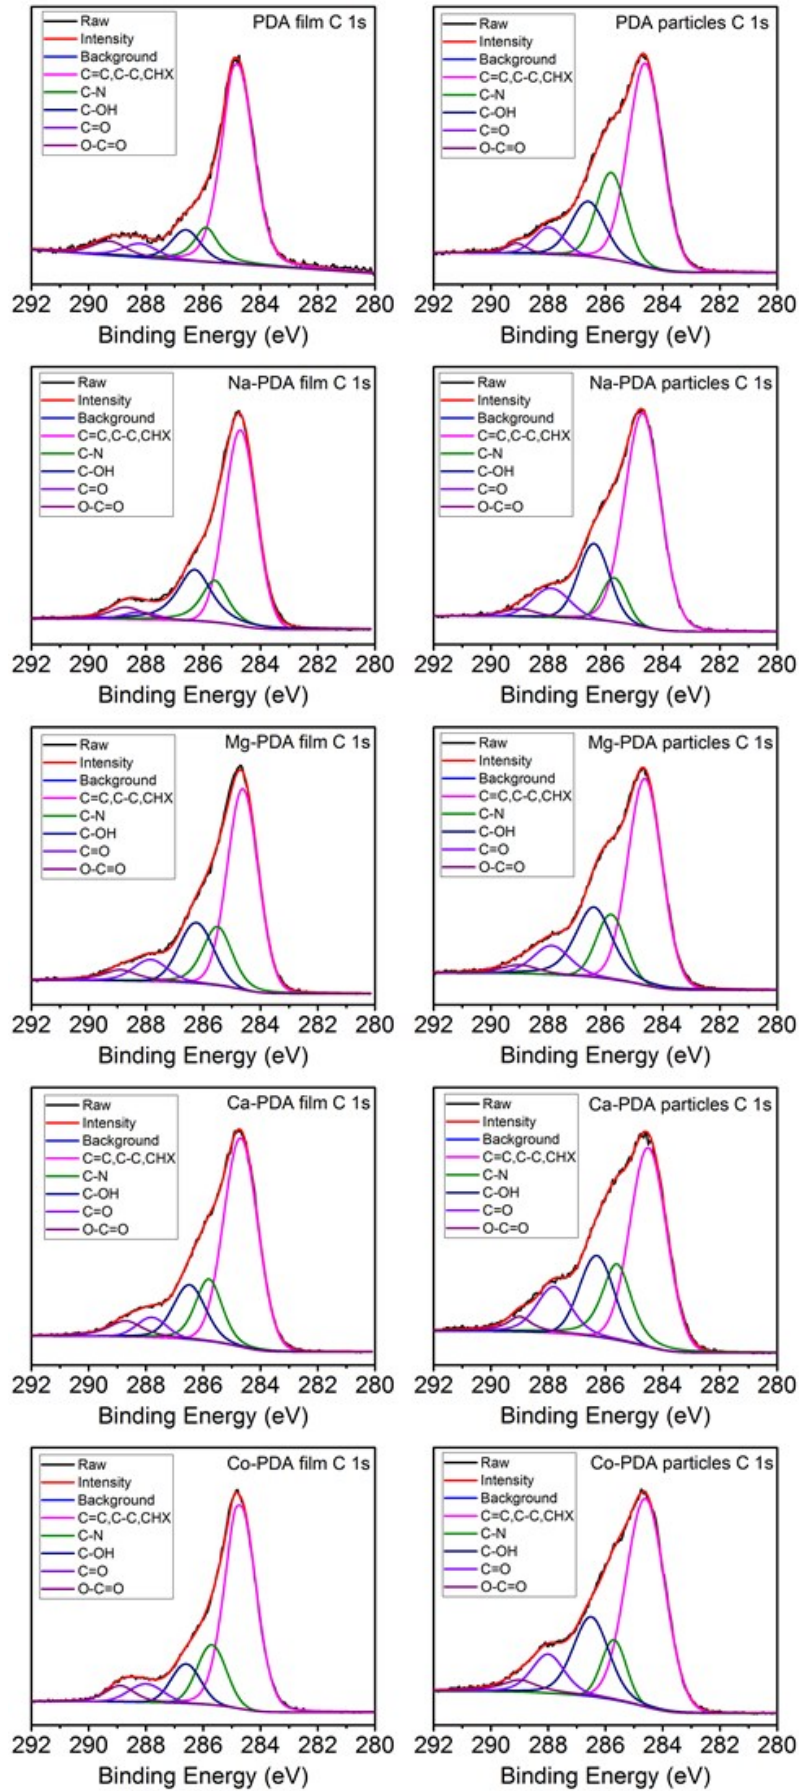

Figure S6. The high-resolution XPS spectra of the C1s core-level for PDA-Na, PDA-Mg, PDA-Ca and PDA-Co film samples were compared with pristine PDA films.

Table S3. The detailed component in C1s of polydopamine films and nanoparticles generated in different conditions.

| samples |      | C1s      |      |      |      |        |
|---------|------|----------|------|------|------|--------|
|         |      | C=C, C-C | C-N  | C-OH | C=O  | -O-C=O |
| PDA     | film | 67.9     | 11.2 | 9.9  | 5.4  | 5.5    |
|         | NPs  | 55.5     | 20.9 | 15.4 | 6.3  | 1.9    |
| PDA-Na  | film | 57.6     | 13.9 | 21.6 | 2.3  | 4.6    |
|         | NPs  | 61.9     | 8.5  | 18.8 | 8.4  | 2.5    |
| PDA-Mg  | film | 54.1     | 17.0 | 17.4 | 7.0  | 4.4    |
|         | NPs  | 54.2     | 13.9 | 22.2 | 8.7  | 2.8    |
| PDA-Ca  | film | 58.1     | 15.5 | 15.5 | 5.0  | 5.8    |
|         | NPs  | 47.9     | 18.3 | 18.2 | 11.9 | 3.6    |
| PDA-Co  | film | 62.7     | 16.0 | 10.5 | 5.7  | 5.2    |
|         | NPs  | 54.7     | 10.0 | 21.1 | 9.9  | 4.3    |



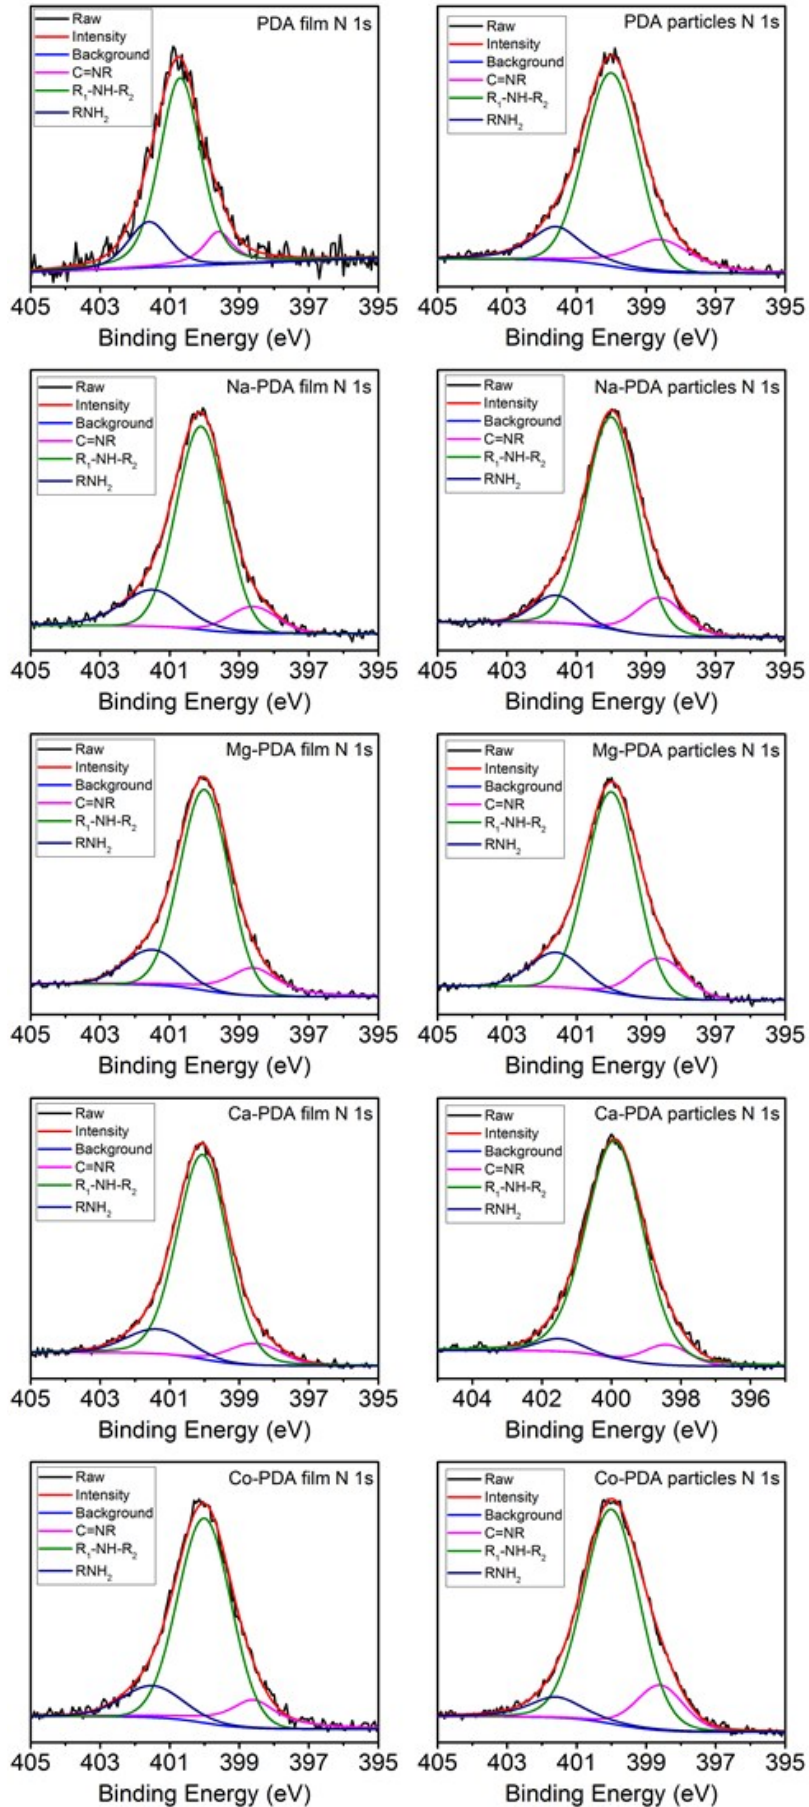

Figure S7. The high-resolution XPS spectra of the N1s core-level for PDA-Na, PDA-Mg, PDA-Ca and PDA-Co film samples were compared with pristine PDA films.

Table S4. The detailed component in N1s of polydopamine films and nanoparticles generated in different conditions.

| samples |      | N1s  |                                   |                  |
|---------|------|------|-----------------------------------|------------------|
|         |      | C=NR | R <sub>1</sub> -NH-R <sub>2</sub> | RNH <sub>2</sub> |
| PDA     | film | 11.1 | 71.3                              | 17.5             |
|         | NPs  | 16.8 | 68.2                              | 15.0             |
| PDA-Na  | film | 9.3  | 71.7                              | 19.0             |
|         | NPs  | 13.6 | 77.8                              | 8.6              |
| PDA-Mg  | film | 13.5 | 72.0                              | 14.5             |
|         | NPs  | 14.6 | 72.0                              | 13.4             |
| PDA-Ca  | film | 8.4  | 80.4                              | 11.2             |
|         | NPs  | 6.1  | 90.1                              | 3.7              |
| PDA-Co  | film | 13.6 | 72.6                              | 13.8             |
|         | NPs  | 14.4 | 76.8                              | 8.8              |

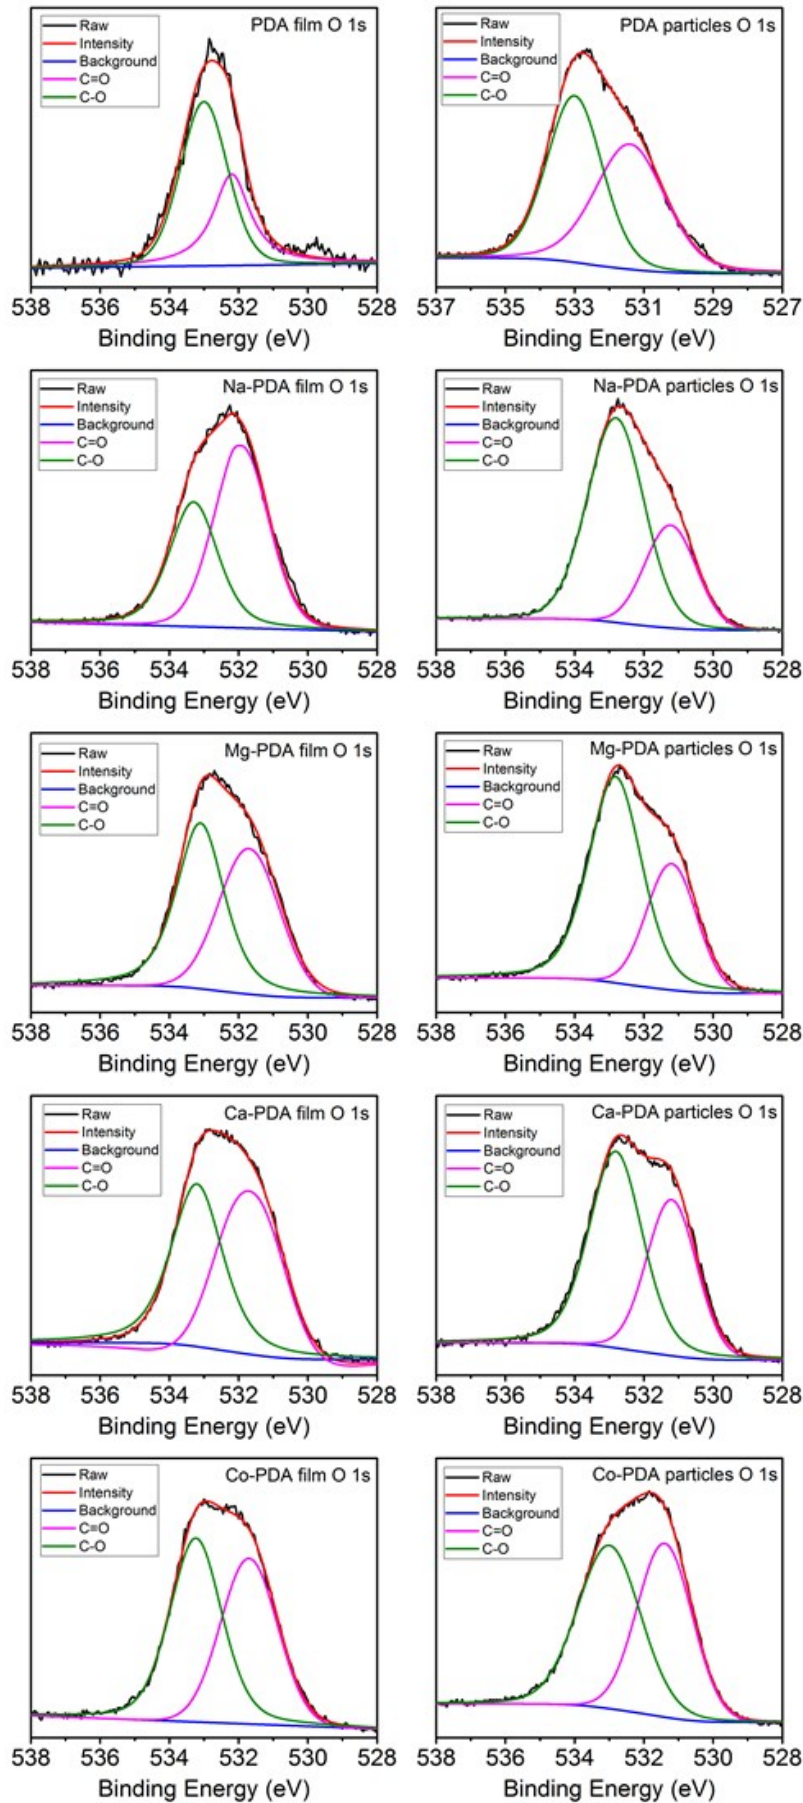

Figure S8. The high-resolution XPS spectra of the O1s core-level for PDA-Na, PDA-Mg, PDA-Ca and PDA-Co film samples were compared with pristine PDA films.

Table S5. The detailed component in O1s of polydopamine films and nanoparticles generated in different conditions.

| samples |      | O1s  |      |
|---------|------|------|------|
|         |      | C=O  | C-O  |
| PDA     | film | 37.3 | 62.7 |
|         | NPs  | 49.3 | 50.7 |
| PDA-Na  | film | 61.6 | 38.4 |
|         | NPs  | 30.1 | 69.9 |
| PDA-Mg  | film | 47.0 | 53.0 |
|         | NPs  | 33.5 | 66.5 |
| PDA-Ca  | film | 44.6 | 55.4 |
|         | NPs  | 40.1 | 59.9 |
| PDA-Co  | film | 46.3 | 53.7 |
|         | NPs  | 46.7 | 53.3 |

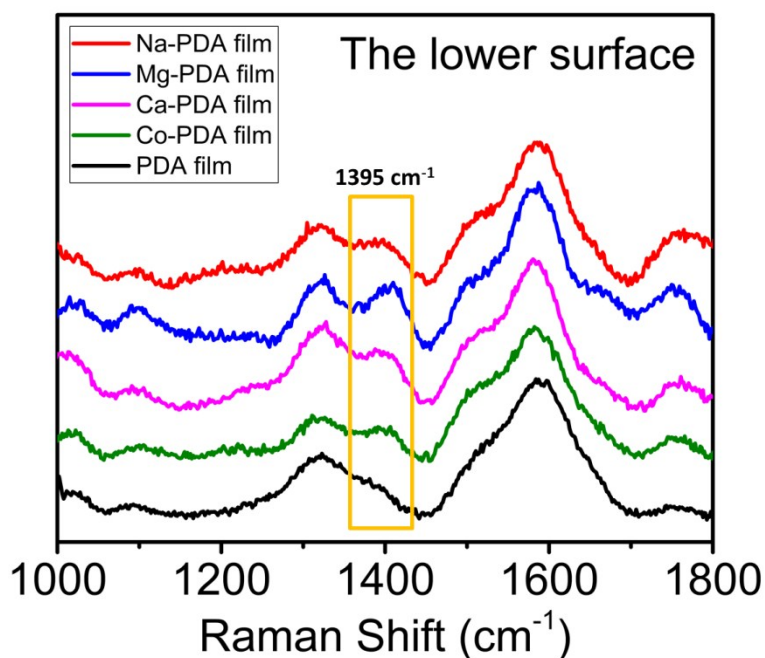

Figure S9. Raman spectra of the lower surface of PDA films generated in salty conditions.

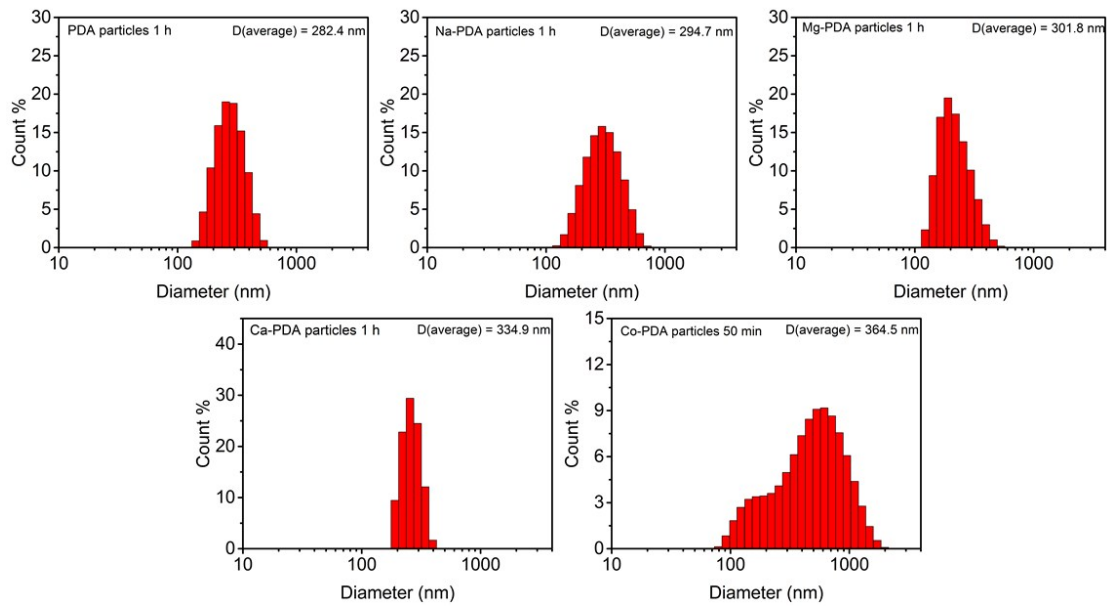

Figure S10. DLS of PDA nanoparticles in the suspension of different systems after 1 h reaction.
